# Supplementary material for: Zero-point vibrational contributions to fluorine shieldings in organic molecules
Source: Royal Society of Chemistry journal article supplement (doi:10.1039/b307345a), 2003-01-01
Supplement: b307345a.pdf [file b307345a.pdf]

# Zero-point vibrational contributions to fluorine shieldings in organic molecules: Supplementary material

Per-Olof Åstrand

*Department of Chemistry, Physical Chemistry, Norwegian University of Science and Engineering, N-7491 Trondheim, Norway*

Kenneth Ruud

*Department of Chemistry, University of Tromsø, N-9037 Tromsø, Norway*

TABLE I. Contributions to the proton and carbon isotropic shielding constants of **fluoromethanes** as obtained at the Hartree–Fock level. All shielding constants reported in ppm.

|                    |            | $\sigma_e$ | $\sigma_{eff}$ | $\sigma_{eff} - \sigma_e$ | $\langle\sigma_2^{(0)}\rangle$ | $\langle\sigma\rangle_{ZPV}$ | $\langle\sigma\rangle$ |
|--------------------|------------|------------|----------------|---------------------------|--------------------------------|------------------------------|------------------------|
| fluoromethane      | $\sigma^C$ | 131.29     | 129.31         | -1.98                     | -1.74                          | -3.72                        | 127.57                 |
|                    | $\sigma^H$ | 28.51      | 28.21          | -0.30                     | -0.32                          | -0.62                        | 27.89                  |
| difluoromethane    | $\sigma^C$ | 98.71      | 97.15          | -1.56                     | -1.57                          | -3.13                        | 95.58                  |
|                    | $\sigma^H$ | 27.60      | 27.34          | -0.26                     | -0.34                          | -0.60                        | 27.00                  |
| trifluoromethane   | $\sigma^C$ | 90.83      | 89.61          | -1.21                     | -0.84                          | -2.05                        | 88.76                  |
|                    | $\sigma^H$ | 27.24      | 26.97          | -0.27                     | -0.31                          | -0.58                        | 26.66                  |
| tetrafluoromethane | $\sigma^C$ | 87.00      | 86.07          | -0.93                     | -0.04                          | -0.97                        | 86.03                  |

TABLE II. Contributions to the proton and carbon isotropic shielding constants of **fluoroethanes** as obtained at the Hartree–Fock level. All shielding constants reported in ppm.

|                                    |                   | $\sigma_e$ | $\sigma_{eff}$ | $\sigma_{eff} - \sigma_e$ | $\langle\sigma_2^{(0)}\rangle$ | $\langle\sigma\rangle_{ZPV}$ | $\langle\sigma\rangle$ |
|------------------------------------|-------------------|------------|----------------|---------------------------|--------------------------------|------------------------------|------------------------|
| fluoroethane <sup>a</sup>          | $\sigma^{C1}$     | 178.58     | 178.11         | -0.47                     | -3.32                          | -3.79                        | 174.79                 |
|                                    | $\sigma^{C2}$     | 123.39     | 121.77         | -1.62                     | -2.65                          | -4.27                        | 119.12                 |
|                                    | $\sigma^{H1,2}$   | 30.99      | 30.92          | -0.07                     | -0.56                          | -0.63                        | 30.36                  |
|                                    | $\sigma^{H3,4}$   | 28.41      | 28.17          | -0.24                     | -0.40                          | -0.64                        | 27.77                  |
|                                    | $\sigma^{H5}$     | 31.66      | 31.64          | -0.02                     | -0.64                          | -0.66                        | 31.00                  |
| 1,2-difluoroethane <sup>b</sup>    | $\sigma^C$        | 120.05     | 118.80         | -1.25                     | -2.87                          | -4.12                        | 115.93                 |
|                                    | $\sigma^{H1}$     | 28.13      | 27.95          | -0.18                     | -0.41                          | -0.59                        | 28.54                  |
|                                    | $\sigma^{H2}$     | 28.69      | 28.52          | -0.17                     | -0.42                          | -0.59                        | 28.10                  |
| 1,1-difluoroethane <sup>c</sup>    | $\sigma^{C1}$     | 174.58     | 174.48         | -0.10                     | -3.57                          | -3.67                        | 170.91                 |
|                                    | $\sigma^{C2}$     | 92.54      | 91.09          | -1.45                     | -1.77                          | -3.22                        | 89.32                  |
|                                    | $\sigma^{H1,2}$   | 31.23      | 31.25          | 0.02                      | -0.64                          | -0.62                        | 30.61                  |
|                                    | $\sigma^{H3}$     | 30.87      | 30.89          | 0.02                      | -0.62                          | -0.60                        | 30.27                  |
|                                    | $\sigma^{H4}$     | 27.40      | 27.16          | -0.24                     | -0.33                          | -0.57                        | 26.83                  |
| 1,1,1-trifluoroethane <sup>d</sup> | $\sigma^{C1}$     | 174.42     | 174.45         | 0.03                      | -3.39                          | -3.36                        | 171.06                 |
|                                    | $\sigma^{C2}$     | 82.31      | 81.18          | -1.13                     | -0.86                          | -1.99                        | 80.32                  |
|                                    | $\sigma^{H1,2,3}$ | 30.93      | 30.98          | 0.05                      | -0.63                          | -0.58                        | 30.35                  |
| hexafluoroethane                   | $\sigma^C$        | 91.02      | 90.31          | -0.72                     | -0.43                          | -1.15                        | 89.87                  |

<sup>a</sup>Connectivity: H<sub>5</sub>H<sub>1,2</sub>-C<sub>1</sub>-C<sub>2</sub>-H<sub>3,4</sub>F

<sup>b</sup>The gauche conformation is studied (with H<sub>1</sub> closest to the F atom on the opposite group)

<sup>c</sup>Connectivity: (H<sub>3</sub> H<sub>1,2</sub>)-C<sub>1</sub>-C<sub>2</sub>-(F<sub>1,2</sub> H<sub>4</sub>)

<sup>d</sup>Connectivity: (H<sub>1,2,3</sub>)-C<sub>1</sub>-C<sub>2</sub>-(F<sub>1,2,3</sub>)

TABLE III. Contributions to proton and carbon the isotropic shielding constants of **fluoropropanes** as obtained at the Hartree–Fock level. All shielding constants reported in ppm.

|                                     |                                  | $\sigma_e$     | $\sigma_{eff}$ | $\sigma_{eff} - \sigma_e$ | $\langle\sigma_2^{(0)}\rangle$ | $\langle\sigma\rangle_{ZPV}$ | $\langle\sigma\rangle$ |
|-------------------------------------|----------------------------------|----------------|----------------|---------------------------|--------------------------------|------------------------------|------------------------|
| 1-fluoropropane <sup>a</sup>        | $\sigma^{C_1}$                   | 171.92         | 170.58         | -1.34                     | -3.16                          | -4.50                        | 167.42                 |
|                                     | $\sigma^{C_2}$                   | 118.12         | 117.05         | -1.07                     | -3.66                          | -4.73                        | 113.39                 |
|                                     | $\sigma^{C_3}$                   | 186.32         | 186.40         | 0.08                      | -4.19                          | -4.11                        | 182.21                 |
|                                     | $\sigma^{H_{1,3}}$               | 28.59          | 28.40          | -0.19                     | -0.42                          | -0.61                        | 27.99                  |
|                                     | $\sigma^{H_{2,4}}$               | 31.83          | 31.85          | 0.02                      | -0.71                          | -0.69                        | 31.14                  |
|                                     | $\sigma^{H_5}$                   | 31.37          | 31.42          | 0.05                      | -0.72                          | -0.67                        | 30.70                  |
|                                     | $\sigma^{H_{6,7}}$               | 30.84          | 30.63          | -0.21                     | -0.49                          | -0.70                        | 30.14                  |
| 2-fluoropropane <sup>b</sup>        | $\sigma^{C_1}$                   | 117.79         | 116.18         | -1.61                     | -3.16                          | -4.77                        | 113.02                 |
|                                     | $\sigma^{C_2}$                   | 173.21         | 173.35         | 0.14                      | -4.65                          | -4.51                        | 168.70                 |
|                                     | $\sigma^{H_1}$                   | 31.63          | 31.68          | 0.05                      | -0.75                          | -0.70                        | 30.93                  |
|                                     | $\sigma^{H_3}$                   | 31.22          | 31.24          | 0.02                      | -0.68                          | -0.66                        | 30.56                  |
|                                     | $\sigma^{H_6}$                   | 30.91          | 30.93          | 0.02                      | -0.68                          | -0.66                        | 30.25                  |
|                                     | $\sigma^{H_7}$                   | 28.21          | 27.98          | -0.23                     | -0.40                          | -0.63                        | 27.58                  |
|                                     | 2,2-difluoropropane <sup>c</sup> | $\sigma^{C_1}$ | 87.12          | 85.71                     | -1.41                          | -1.12                        | -2.53                  |
| $\sigma^{C_2}$                      |                                  | 171.12         | 171.32         | 0.20                      | -3.85                          | -3.65                        | 167.47                 |
| $\sigma^{H_{1,2,3,4}}$              |                                  | 31.24          | 31.29          | 0.05                      | -0.77                          | -0.72                        | 30.52                  |
| $\sigma^{H_{5,6}}$                  |                                  | 30.78          | 30.83          | 0.05                      | -0.75                          | -0.70                        | 30.08                  |
| 1,1,1-trifluoropropane <sup>d</sup> | $\sigma^{C_1}$                   | 167.97         | 160.20         | -0.77                     | -3.37                          | -4.14                        | 163.83                 |
|                                     | $\sigma^{C_2}$                   | 81.31          | 80.29          | -1.02                     | -1.07                          | -2.09                        | 79.22                  |
|                                     | $\sigma^{C_3}$                   | 188.02         | 188.62         | 0.60                      | -5.55                          | -4.95                        | 183.07                 |
|                                     | $\sigma^{H_{1,2}}$               | 31.32          | 31.47          | 0.15                      | -1.00                          | -0.85                        | 30.47                  |
|                                     | $\sigma^{H_3}$                   | 31.50          | 31.63          | 0.13                      | -0.90                          | -0.77                        | 30.73                  |
|                                     | $\sigma^{H_{4,5}}$               | 30.82          | 30.69          | -0.13                     | -0.50                          | -0.63                        | 30.19                  |

<sup>a</sup>Connectivity: (H<sub>1,3</sub> F)-C<sub>2</sub>-C<sub>1</sub>(H<sub>6,7</sub>)-C<sub>3</sub>-(H<sub>2,4</sub> H<sub>5</sub>)

<sup>b</sup>Connectivity: (H<sub>1</sub> H<sub>3</sub> H<sub>6</sub>)-C<sub>2</sub>-C<sub>1</sub>(H<sub>7</sub> F)-C<sub>2</sub>-(H<sub>1</sub> H<sub>3</sub> H<sub>6</sub>)

<sup>c</sup>Connectivity: (H<sub>3,4,6</sub>)-C<sub>2</sub>-C<sub>1</sub>(F<sub>1,2</sub>)-C<sub>2</sub>-(H<sub>1,2,5</sub>)

<sup>d</sup>Connectivity: (F<sub>1</sub>F<sub>2,3</sub>)-C<sub>2</sub>-C<sub>1</sub>(H<sub>4,5</sub>)-C<sub>3</sub>-(H<sub>1,2</sub>H<sub>3</sub>)

TABLE IV. Contributions to proton and carbon the isotropic shielding constants of **fluorobutanes** as obtained at the Hartree–Fock level. All shielding constants reported in ppm.

|                             |                             | $\sigma_\epsilon$ | $\sigma_{eff}$ | $\sigma_{eff} - \sigma_\epsilon$ | $\langle\sigma_2^{(0)}\rangle$ | $\langle\sigma\rangle_{ZPV}$ | $\langle\sigma\rangle$ |
|-----------------------------|-----------------------------|-------------------|----------------|----------------------------------|--------------------------------|------------------------------|------------------------|
| 1-fluorobutane <sup>a</sup> | $\sigma^{C_1}$              | 177.72            | 176.78         | -0.94                            | -3.90                          | -4.84                        | 172.88                 |
|                             | $\sigma^{C_2}$              | 163.89            | 162.90         | -0.99                            | -3.84                          | -4.83                        | 159.06                 |
|                             | $\sigma^{C_3}$              | 180.46            | 180.98         | 0.52                             | -5.49                          | -4.97                        | 175.49                 |
|                             | $\sigma^{C_4}$              | 118.96            | 118.21         | -0.75                            | -3.94                          | -4.69                        | 114.27                 |
|                             | $\sigma^{H_{1,2}}$          | 31.54             | 31.62          | 0.08                             | -0.81                          | -0.73                        | 30.81                  |
|                             | $\sigma^{H_{3,4}}$          | 28.58             | 28.45          | -0.13                            | -0.45                          | -0.58                        | 28.00                  |
|                             | $\sigma^{H_5}$              | 31.34             | 31.43          | 0.09                             | -0.76                          | -0.67                        | 30.67                  |
|                             | $\sigma^{H_{7,8}}$          | 31.53             | 31.37          | -0.16                            | -0.59                          | -0.75                        | 30.78                  |
|                             | $\sigma^{H_{9,10}}$         | 30.92             | 30.74          | -0.18                            | -0.51                          | -0.69                        | 30.23                  |
|                             | 2-fluorobutane <sup>b</sup> | $\sigma^{C_1}$    | 165.84         | 165.10                           | -0.74                          | -4.76                        | -5.50                  |
| $\sigma^{C_2}$              |                             | 113.38            | 111.89         | -1.49                            | -3.04                          | -4.53                        | 108.85                 |
| $\sigma^{C_3}$              |                             | 183.70            | 184.32         | 0.62                             | -6.65                          | -6.03                        | 177.67                 |
| $\sigma^{C_4}$              |                             | 173.73            | 173.98         | 0.25                             | -5.04                          | -4.79                        | 168.94                 |
| $\sigma^{H_1}$              |                             | 31.64             | 31.77          | 0.13                             | -1.16                          | -1.03                        | 30.61                  |
| $\sigma^{H_2}$              |                             | 31.03             | 31.17          | 0.14                             | -1.12                          | -0.98                        | 30.05                  |
| $\sigma^{H_3}$              |                             | 31.66             | 31.72          | 0.06                             | -0.85                          | -0.79                        | 30.87                  |
| $\sigma^{H_4}$              |                             | 31.23             | 31.28          | 0.05                             | -0.80                          | -0.75                        | 30.48                  |
| $\sigma^{H_5}$              |                             | 31.49             | 31.60          | 0.11                             | -1.06                          | -0.95                        | 30.54                  |
| $\sigma^{H_6}$              |                             | 30.94             | 30.99          | 0.05                             | -0.72                          | -0.67                        | 30.27                  |
| $\sigma^{H_7}$              |                             | 31.39             | 31.27          | -0.12                            | -0.61                          | -0.73                        | 30.66                  |
| $\sigma^{H_8}$              |                             | 31.04             | 30.90          | -0.14                            | -0.54                          | -0.68                        | 30.36                  |
| $\sigma^{H_9}$              |                             | 28.47             | 28.25          | -0.22                            | -0.43                          | -0.65                        | 27.82                  |

<sup>a</sup>Connectivity: (F<sub>1</sub>H<sub>3,4</sub>)-C<sub>4</sub>-C<sub>2</sub>(H<sub>9,10</sub>)-C<sub>1</sub>(H<sub>7,8</sub>)-C<sub>3</sub>-(H<sub>1,2</sub>H<sub>5</sub>)

<sup>b</sup>Connectivity: (H<sub>3</sub>H<sub>4</sub>H<sub>6</sub>)-C<sub>4</sub>-C<sub>2</sub>(H<sub>9</sub>F<sub>1</sub>)-C<sub>1</sub>(H<sub>7</sub>H<sub>8</sub>)-C<sub>3</sub>-(H<sub>1</sub>H<sub>2</sub>H<sub>5</sub>)

TABLE V. Contributions to proton and carbon the isotropic shielding constants of **fluoroethenes** as obtained at the Hartree–Fock level. All shielding constants reported in ppm.

|                                  |                      | $\sigma_e$ | $\sigma_{eff}$ | $\sigma_{eff} - \sigma_e$ | $\langle\sigma_2^{(0)}\rangle$ | $\langle\sigma\rangle_{ZPV}$ | $\langle\sigma\rangle$ |
|----------------------------------|----------------------|------------|----------------|---------------------------|--------------------------------|------------------------------|------------------------|
| fluoroethene <sup>a</sup>        | $\sigma^{C_1}$       | 95.46      | 94.16          | -1.30                     | -2.91                          | -4.21                        | 91.25                  |
|                                  | $\sigma^{C_2}$       | 35.99      | 34.76          | -1.23                     | -1.96                          | -3.19                        | 32.80                  |
|                                  | $\sigma^{H_{trans}}$ | 27.91      | 27.80          | -0.11                     | -0.33                          | -0.44                        | 27.47                  |
|                                  | $\sigma^{H_{cis}}$   | 27.41      | 27.26          | -0.15                     | -0.37                          | -0.52                        | 26.89                  |
|                                  | $\sigma^{H_3}$       | 25.96      | 25.79          | -0.17                     | -0.30                          | -0.47                        | 25.49                  |
| 1,1-difluoroethene <sup>b</sup>  | $\sigma^{C_1}$       | 129.16     | 128.15         | -1.01                     | -2.44                          | -3.45                        | 125.71                 |
|                                  | $\sigma^{C_2}$       | 30.44      | 29.44          | -1.00                     | -0.68                          | -1.68                        | 28.76                  |
|                                  | $\sigma^{H_{1,2}}$   | 28.57      | 28.49          | -0.08                     | -0.39                          | -0.47                        | 28.10                  |
| <i>trans</i> -1,2-difluoroethene | $\sigma^C$           | 46.95      | 45.66          | -1.29                     | -2.27                          | -3.58                        | 43.37                  |
|                                  | $\sigma^H$           | 25.18      | 25.02          | -0.16                     | -0.32                          | -0.48                        | 24.70                  |
| <i>cis</i> -1,2-difluoroethene   | $\sigma^C$           | 57.39      | 56.15          | -1.24                     | -2.40                          | -3.64                        | 53.75                  |
|                                  | $\sigma^H$           | 26.52      | 26.38          | -0.14                     | -0.31                          | -0.45                        | 26.07                  |
| trifluoroethene <sup>c</sup>     | $\sigma^{C_1}$       | 76.79      | 75.74          | -1.05                     | -2.38                          | -3.43                        | 73.36                  |
|                                  | $\sigma^{C_2}$       | 37.12      | 36.07          | -1.05                     | -1.35                          | -2.40                        | 34.72                  |
|                                  | $\sigma^H$           | 26.11      | 25.99          | -0.12                     | -0.38                          | -0.50                        | 25.61                  |

<sup>a</sup>Connectivity: (H<sub>trans</sub> H<sub>cis</sub>)-C<sub>1</sub>=C<sub>2</sub>(H<sub>3</sub> F)

<sup>b</sup>Connectivity: (H<sub>1,2</sub>-C<sub>1</sub>=C<sub>2</sub>-F<sub>1,2</sub>)

<sup>c</sup>Connectivity: (F<sub>trans</sub> F<sub>cis</sub>)-C<sub>2</sub>=C<sub>1</sub>(F<sub>3</sub> H)

TABLE VI. Contributions to proton and carbon the isotropic shielding constants of **fluorobenzenes** as obtained at the Hartree–Fock level. All shielding constants reported in ppm.

|                           |                    | $\sigma_e$ | $\sigma_{eff}$ | $\sigma_{eff} - \sigma_e$ | $\langle\sigma_2^{(0)}\rangle$ | $\langle\sigma\rangle_{ZPV}$ | $\langle\sigma\rangle$ |
|---------------------------|--------------------|------------|----------------|---------------------------|--------------------------------|------------------------------|------------------------|
| fluorobenzene             | $\sigma^{C_F}$     | 25.66      | 24.49          | -1.17                     | -3.70                          | -4.87                        | 20.79                  |
|                           | $\sigma^{C_o}$     | 74.09      | 72.91          | -1.18                     | -2.20                          | -3.38                        | 70.71                  |
|                           | $\sigma^{C_m}$     | 56.32      | 55.09          | -1.23                     | -2.27                          | -3.50                        | 52.82                  |
|                           | $\sigma^{C_p}$     | 65.82      | 64.55          | -1.27                     | -2.36                          | -3.63                        | 62.19                  |
|                           | $\sigma^{H_o}$     | 25.11      | 24.99          | -0.12                     | -0.28                          | -0.40                        | 24.71                  |
|                           | $\sigma^{H_m}$     | 24.81      | 24.69          | -0.12                     | -0.21                          | -0.33                        | 24.48                  |
|                           | $\sigma^{H_p}$     | 25.15      | 25.04          | -0.11                     | -0.19                          | -0.30                        | 24.85                  |
| <i>o</i> -difluorobenzene | $\sigma^{C_o}$     | 70.60      | 69.47          | -1.13                     | -1.70                          | -2.83                        | 67.77                  |
|                           | $\sigma^{C_F}$     | 39.73      | 38.65          | -1.08                     | -3.30                          | -4.38                        | 35.35                  |
|                           | $\sigma^{C_m}$     | 63.78      | 62.56          | -1.22                     | -1.95                          | -3.17                        | 60.61                  |
|                           | $\sigma^{H_o}$     | 25.00      | 24.89          | -0.11                     | -0.20                          | -0.31                        | 24.69                  |
|                           | $\sigma^{H_m}$     | 25.15      | 25.04          | -0.11                     | -0.15                          | -0.26                        | 24.89                  |
| <i>m</i> -difluorobenzene | $\sigma^{C_m}$     | 53.64      | 52.47          | -1.17                     | -2.92                          | -4.09                        | 49.55                  |
|                           | $\sigma^{C_{2,3}}$ | 80.10      | 78.93          | -1.17                     | -2.40                          | -3.57                        | 76.53                  |
|                           | $\sigma^{C_F}$     | 24.04      | 22.94          | -1.10                     | -2.85                          | -3.95                        | 20.09                  |
|                           | $\sigma^{C_o}$     | 87.09      | 85.96          | -1.13                     | -1.98                          | -3.11                        | 83.98                  |
|                           | $\sigma^{H_m}$     | 24.81      | 24.69          | -0.12                     | -0.19                          | -0.31                        | 24.50                  |
|                           | $\sigma^{H_{2,3}}$ | 25.44      | 25.33          | -0.11                     | -0.21                          | -0.32                        | 25.12                  |
|                           | $\sigma^{H_o}$     | 25.38      | 25.27          | -0.11                     | -0.27                          | -0.38                        | 25.00                  |
| <i>p</i> -difluorobenzene | $\sigma^{C_F}$     | 31.25      | 30.09          | -1.16                     | -1.72                          | -2.88                        | 28.37                  |
|                           | $\sigma^{C_H}$     | 71.64      | 70.47          | -1.17                     | -2.95                          | -4.12                        | 67.52                  |
|                           | $\sigma^H$         | 25.13      | 25.01          | -0.12                     | -0.32                          | -0.44                        | 24.69                  |
